# Supplementary material for: Oxygen for relief of dyspnoea in people with chronic obstructive pulmonary disease who would not qualify for home oxygen: a systematic review and meta-analysis: Figure 1
Source: HighWire-hosted journal article supplement (doi:10.1136/thoraxjnl-2014-205720), 2014-12-03
Supplement: thoraxjnl-2014-205720supp.pdf [file thoraxjnl-2014-205720supp.pdf]

Search strategies for Palliative oxygen in non-hypoxaemic COPD

**THE COCHRANE SPECIALISED AIRWAYS REGISTER**

(dyspnea OR dyspnoea OR breathlessness) AND (oxygen OR oxygen inhalation therapy OR O2 or LTOT) AND COPD (all as textword or index terms)

**MEDLINE (1966 to present)**

(Combined with RCT filter)

- 1 Dyspnea.mp
- 2 dyspnoea.mp
- 3 breathlessness.mp
- 4 or/1-3 (25112)
- 5 (oxygen\$ or O2).mp
- 6 exp OXYGEN INHALATION THERAPY/
- 7 (oxygen adj3 therap\$).mp
- 8 (long term oxygen therap\$ or LTOT).mp
- 9 respiratory therapy/
- 10 or/5-9
- 11 lung diseases, obstructive/ or bronchitis/ or exp bronchitis, chronic/
- 12 exp Pulmonary Disease, Chronic Obstructive/
- 13 (obstruct\$ adj3 (lung\$ or respirat\$ or pulmonar\$) adj3 disease\$).mp
- 16 (COPD or COAD).mp
- 17 or/11-16
- 18 4 and 10 and 17
- 19 exp "clinical trial [publication type]"/
- 20 (randomized or randomised).ab,ti.
- 21 placebo.ab,ti.
- 22 dt.fs.
- 23 randomly.ab,ti.
- 24 trial.ab,ti.
- 25 groups.ab,ti.
- 26 or/19-25
- 27 Animals/
- 28 Humans/
- 29 27 not (27 and 28)
- 30 26 not 29
- 31 18 and 30

## EMBASE (1980 to present)

(Combined with RCT filter

- 1 exp dyspnea/ or Dyspnea.mp. or dyspnoea.mp. or breathlessness.mp.
- 2 (oxygen\$ or O2).mp.
- 3 exp OXYGEN INHALATION THERAPY/
- 4 (oxygen adj3 therap\$).mp.
- 5 (long term oxygen therap\$ or LTOT).mp.
- 6 respiratory therapy/
- 7 or/2-6
- 8 lung diseases, obstructive/ or bronchitis/ or exp bronchitis, chronic/
- 9 exp Pulmonary Disease, Chronic Obstructive/
- 10 (obstruct\$ adj3 (lung\$ or respirat\$ or pulmonar\$) adj3 disease\$).mp.
- 11 (Bronchiti\$ or emphysema\$).mp.
- 12 ((chronic adj5 obstruct\$) and (pulmonar\$ or lung\$ or airway\$ or airflow\$ or bronch\$ or respirat\$)).mp.
- 13 (COPD or COAD).mp.
- 14 Chronic Obstructive Lung Disease/
- 15 or/8-14
- 16 1 and 7 and 15
- 17 Randomized Controlled Trial/
- 18 Controlled Study/
- 19 randomization/
- 20 Double Blind Procedure/
- 21 Single Blind Procedure/
- 22 Clinical Trial/
- 23 Crossover Procedure/
- 24 follow up/
- 25 exp prospective study/
- 26 or/17-25
- 27 (clinica\$ adj3 trial\$).mp.
- 28 ((singl\$ or doubl\$ or trebl\$ or tripl\$) adj5 (mask\$ or blind\$ or method\$)).mp.
- 29 exp Placebo/
- 30 placebo\$.mp.
- 31 random\$.mp.
- 32 (latin adj3 square\$).mp.
- 33 exp Comparative Study/
- 34 ((control\$ or prospectiv\$ or volunteer\$) adj3 (trial\$ or method\$ or stud\$)).mp.
- 35 (crossover\$ or cross-over\$).mp.
- 36 or/27-35
- 37 26 or 36

38 exp ANIMAL/  
39 Nonhuman/  
40 Human/  
41 38 or 39  
42 41 not 40  
43 37 not 42  
44 16 and 43
